# Supplementary material
Source: PubMed Central journal article supplement (PMC6737526)
Supplement: NIHMS1049437-supplement-1.pdf [file NIHMS1049437-supplement-1.pdf]

**Supplemental Table S1. USDA food codes and logic for apportioning dietary intake**

| <i>Food Group</i>               | <i>USDA food code and additional logic</i>                                                                                                                                                                            |
|---------------------------------|-----------------------------------------------------------------------------------------------------------------------------------------------------------------------------------------------------------------------|
| Milk and Milk Products          | DR1IFDCD = 1                                                                                                                                                                                                          |
| Meat, poultry, mixtures         | DR1IFDCD = 2                                                                                                                                                                                                          |
| Eggs                            | DR1IFDCD = 3                                                                                                                                                                                                          |
| Legumes, nuts, and seeds        | DR1IFDCD = 4                                                                                                                                                                                                          |
| Grain products                  | DR1IFDCD = 5                                                                                                                                                                                                          |
| Fruits                          | DR1IFDCD = 6                                                                                                                                                                                                          |
| Vegetables                      | DR1IFDCD = 7                                                                                                                                                                                                          |
| Fats, oils, and salad dressings | DR1IFDCD = 8                                                                                                                                                                                                          |
| Sugars, sweets, and beverages   | DR1IFDCD = 9                                                                                                                                                                                                          |
| Cured meats                     | DR1IFDCD = 22107, 223001, 223110, 22321110, 22421, 2243, 226002, 22602, 22601000, 22602, 23321050, 25160110, 21603<br>Then subtract total mass from DR1IFDCD = 2                                                      |
| Luncheon meats and hot dogs     | DR1IFDCD = 25220010, 252302, 252303, 25230410, 25230510, 25230520, 25230530, 25230540, 25230550, 252307, 252309. 25231110,2756000,2521, 271202, 27420040, 275603, 27564<br>Then subtract total mass from DR1IFDCD = 2 |
| Tap water                       | DR1IFDCD = 41811600, 41811400<br>Then subtract total mass from DR1IFDCD=4<br>DR1IFDCD = 94000100<br>Then subtract total mass from DR1IFDCD=9                                                                          |

**Supplemental Table S2. Nitromethane sample-weighted geometric means (ng/L) and selected percentiles for non-users, NHANES 2007-2012 (N=5,345)**

| <i>Demographic Category</i> |                      | <i>N<sup>a</sup></i> | <i>GM<sup>b</sup></i><br>(ng/L) | <i>Selected Percentiles</i> |                        |                        |                        |                        |                        |                        |
|-----------------------------|----------------------|----------------------|---------------------------------|-----------------------------|------------------------|------------------------|------------------------|------------------------|------------------------|------------------------|
|                             |                      |                      |                                 | <i>5<sup>th</sup></i>       | <i>10<sup>th</sup></i> | <i>25<sup>th</sup></i> | <i>50<sup>th</sup></i> | <i>75<sup>th</sup></i> | <i>90<sup>th</sup></i> | <i>95<sup>th</sup></i> |
| <b>Age (years)</b>          | All                  | 5345                 | 646 [627, 665] <sup>c</sup>     | 373<br>[362, 384]           | 415<br>[404, 427]      | 502<br>[488, 516]      | 625<br>[608, 642]      | 797<br>[768, 826]      | 1020<br>[983, 1060]    | 1270<br>[1210, 1330]   |
|                             | 12-19                | 1,045                | 572 [552, 593]                  | 350<br>[328, 372]           | 384<br>[367, 401]      | 459<br>[433, 484]      | 556<br>[534, 579]      | 709<br>[679, 739]      | 870<br>[837, 903]      | 983<br>[925, 1040]     |
|                             | 20-39                | 1,393                | 628 [605, 651]                  | 372<br>[352, 393]           | 424<br>[402, 446]      | 501<br>[481, 521]      | 619<br>[600, 639]      | 761<br>[732, 790]      | 937<br>[893, 981]      | 1080<br>[1020, 1140]   |
|                             | 40-59                | 1,322                | 650 [626, 674]                  | 386<br>[365, 408]           | 415<br>[398, 433]      | 508<br>[483, 534]      | 631<br>[606, 657]      | 812<br>[779, 845]      | 1030<br>[985, 1080]    | 1250<br>[1150, 1360]   |
|                             | ≥60                  | 1,585                | 713 [680, 746]                  | 386<br>[359, 413]           | 442<br>[421, 462]      | 535<br>[506, 565]      | 669<br>[631, 707]      | 885<br>[819, 951]      | 1310<br>[1210, 1410]   | 1610<br>[1450, 1770]   |
| <b>Sex</b>                  | Male                 | 2505                 | 631 [611, 652]                  | 368<br>[358, 378]           | 409<br>[399, 419]      | 497<br>[479, 515]      | 614<br>[593, 636]      | 773<br>[746, 800]      | 992<br>[940, 1040]     | 1190<br>[1100, 1280]   |
|                             | Female               | 2840                 | 658 [637, 679]                  | 382<br>[366, 398]           | 421<br>[409, 434]      | 510<br>[493, 526]      | 635<br>[614, 656]      | 814<br>[782, 846]      | 1050<br>[1000, 1100]   | 1320<br>[1250, 1390]   |
| <b>Race/<br/>Ethnicity</b>  | Non-Hispanic White   | 2,264                | 624 [604, 644]                  | 367<br>[356, 379]           | 409<br>[401, 417]      | 494<br>[476, 511]      | 610<br>[590, 630]      | 759<br>[730, 788]      | 974<br>[925, 1020]     | 1190<br>[1100, 1270]   |
|                             | Non-Hispanic Black   | 1,078                | 705 [673, 737]                  | 401<br>[377, 425]           | 443<br>[426, 460]      | 535<br>[511, 559]      | 673<br>[634, 712]      | 870<br>[819, 920]      | 1220<br>[1110, 1330]   | 1590<br>[1430, 1760]   |
|                             | Mexican American     | 1,008                | 672 [631, 713]                  | 375<br>[351, 399]           | 422<br>[386, 457]      | 519<br>[483, 555]      | 649<br>[603, 696]      | 836<br>[792, 880]      | 1080<br>[1010, 1160]   | 1270<br>[1120, 1420]   |
|                             | Other Race           | 995                  | 705 [664, 745]                  | 391<br>[350, 432]           | 450<br>[415, 485]      | 544<br>[505, 583]      | 692<br>[649, 735]      | 884<br>[842, 927]      | 1120<br>[1010, 1220]   | 1360<br>[1210, 1500]   |
| <b>BMI</b>                  | Underweight          | 70                   | 568 [510, 626]                  | 327 <sup>d</sup>            | 375 <sup>d</sup>       | 467<br>[410, 524]      | 551<br>[488, 614]      | 679<br>[553, 804]      | 840<br>[714, 966]      | 943<br>[550, 1340]     |
|                             | Healthy weight       | 1724                 | 610 [587, 633]                  | 358<br>[345, 371]           | 398<br>[381, 414]      | 473<br>[455, 491]      | 588<br>[564, 613]      | 754<br>[714, 793]      | 975<br>[921, 1030]     | 1140<br>[1040, 1230]   |
|                             | Overweight/<br>Obese | 3551                 | 666 [646, 685]                  | 391<br>[376, 407]           | 433<br>[421, 445]      | 523<br>[508, 538]      | 639<br>[619, 659]      | 812<br>[783, 841]      | 1050<br>[1000, 1100]   | 1330<br>[1260, 1390]   |
| <b>Poverty Status</b>       | No                   | 4252                 | 648 [628, 667]                  | 379<br>[365, 393]           | 420<br>[408, 432]      | 508<br>[493, 522]      | 628<br>[610, 646]      | 793<br>[765, 820]      | 1020<br>[976, 1060]    | 1270<br>[1200, 1340]   |
|                             | Yes                  | 1093                 | 632 [591, 674]                  | 356<br>[334, 378]           | 390<br>[368, 411]      | 478<br>[446, 510]      | 601<br>[556, 646]      | 818<br>[760, 876]      | 1060<br>[988, 1140]    | 1300<br>[1120, 1480]   |

<sup>a</sup>Sample size. <sup>b</sup>Geometric mean. <sup>c</sup>95% confidence interval range. <sup>d</sup>Could not determine 95%CI

**Supplemental Table S3. Nitromethane sample-weighted geometric means (ng/L) and selected percentiles for exclusive smokers, NHANES 2007-2012 (N=1,385)**

| <i>Demographic Category</i> |                    | <i>N<sup>a</sup></i> | <i>GM<sup>b</sup></i><br><i>(ng/L)</i> | <i>Selected Percentiles</i> |                        |                        |                        |                        |                        |                        |
|-----------------------------|--------------------|----------------------|----------------------------------------|-----------------------------|------------------------|------------------------|------------------------|------------------------|------------------------|------------------------|
|                             |                    |                      |                                        | <i>5<sup>th</sup></i>       | <i>10<sup>th</sup></i> | <i>25<sup>th</sup></i> | <i>50<sup>th</sup></i> | <i>75<sup>th</sup></i> | <i>90<sup>th</sup></i> | <i>95<sup>th</sup></i> |
| <b>Age (years)</b>          | All                | 1385                 | 789 [767, 811] <sup>c</sup>            | 470<br>[445, 495]           | 529<br>[502, 555]      | 633<br>[610, 656]      | 774<br>[753, 796]      | 955<br>[927, 982]      | 1220<br>[1130, 1300]   | 1410<br>[1330, 1500]   |
|                             | 12-19              | 112                  | 691 [637, 746]                         | 422 <sup>d</sup>            | 445 <sup>d</sup>       | 559<br>[472, 645]      | 668<br>[630, 706]      | 829<br>[756, 902]      | 1030<br>[809, 1240]    | 1320<br>[939, 1700]    |
|                             | 20-39              | 545                  | 765 [739, 792]                         | 468<br>[423, 513]           | 523<br>[494, 552]      | 631<br>[607, 654]      | 750<br>[719, 782]      | 927<br>[876, 978]      | 1090<br>[1050, 1120]   | 1290<br>[1130, 1450]   |
|                             | 40-59              | 472                  | 793 [764, 822]                         | 470<br>[427, 512]           | 530<br>[481, 579]      | 630<br>[595, 665]      | 781<br>[748, 814]      | 945<br>[906, 984]      | 1230<br>[1120, 1330]   | 1380<br>[1290, 1480]   |
|                             | ≥60                | 256                  | 902 [841, 962]                         | 511<br>[485, 538]           | 549<br>[482, 615]      | 696<br>[633, 759]      | 885<br>[822, 948]      | 1150<br>[998, 1300]    | 1430<br>[1300, 1560]   | 1670<br>[1070, 2260]   |
| <b>Sex</b>                  | Male               | 826                  | 786 [762, 810]                         | 459<br>[419, 500]           | 522<br>[493, 550]      | 628<br>[610, 646]      | 773<br>[752, 795]      | 951<br>[917, 985]      | 1210<br>[1120, 1300]   | 1440<br>[1350, 1540]   |
|                             | Female             | 559                  | 793 [755, 831]                         | 472<br>[425, 520]           | 540<br>[498, 582]      | 645<br>[605, 685]      | 774<br>[730, 819]      | 956<br>[914, 999]      | 1240<br>[1150, 1340]   | 1360<br>[1280, 1450]   |
| <b>Race/<br/>Ethnicity</b>  | Non-Hispanic White | 725                  | 777 [751, 804]                         | 458<br>[421, 496]           | 516<br>[490, 542]      | 627<br>[597, 658]      | 772<br>[745, 798]      | 954<br>[920, 988]      | 1190<br>[1090, 1300]   | 1350<br>[1280, 1420]   |
|                             | Non-Hispanic Black | 349                  | 870 [826, 914]                         | 502<br>[450, 554]           | 583<br>[542, 625]      | 683<br>[644, 722]      | 853<br>[812, 894]      | 1040<br>[955, 1120]    | 1420<br>[1160, 1680]   | 1830<br>[1430, 2230]   |
|                             | Mexican American   | 141                  | 802 [738, 865]                         | 471<br>[374, 569]           | 563<br>[497, 629]      | 634<br>[595, 673]      | 749<br>[693, 804]      | 946<br>[824, 1070]     | 1340<br>[1090, 1600]   | 1580<br>[1270, 1880]   |
|                             | Other Race         | 170                  | 755 [724, 787]                         | 489<br>[371, 607]           | 545<br>[500, 591]      | 632<br>[592, 672]      | 729<br>[704, 754]      | 900<br>[859, 941]      | 1070<br>[933, 1210]    | 1250<br>[1040, 1460]   |
| <b>BMI</b>                  | Underweight        | 45                   | 703 [622, 784]                         | 320 <sup>d</sup>            | 444 <sup>d</sup>       | 613<br>[507, 719]      | 736<br>[649, 822]      | 834<br>[736, 933]      | 988<br>[590, 1390]     | 1120<br>[271, 1980]    |
|                             | Healthy weight     | 475                  | 757 [722, 792]                         | 423<br>[385, 462]           | 496<br>[451, 541]      | 608<br>[564, 651]      | 745<br>[710, 779]      | 918<br>[860, 977]      | 1190<br>[1090, 1290]   | 1410<br>[1290, 1540]   |
|                             | Overweight/Obese   | 865                  | 811 [792, 831]                         | 495<br>[467, 522]           | 555<br>[532, 578]      | 647<br>[626, 667]      | 790<br>[763, 816]      | 965<br>[938, 992]      | 1260<br>[1180, 1340]   | 1430<br>[1360, 1510]   |
| <b>Poverty Status</b>       | No                 | 926                  | 784 [761, 806]                         | 472<br>[443, 501]           | 528<br>[499, 558]      | 632<br>[606, 658]      | 773<br>[747, 798]      | 948<br>[919, 978]      | 1200<br>[1090, 1300]   | 1380<br>[1290, 1460]   |
|                             | Yes                | 459                  | 804 [767, 842]                         | 446<br>[392, 500]           | 530<br>[480, 581]      | 635<br>[600, 671]      | 785<br>[747, 822]      | 988<br>[929, 1050]     | 1310<br>[1170, 1460]   | 1590<br>[1330, 1850]   |

<sup>a</sup>Sample size. <sup>b</sup>Geometric mean. <sup>c</sup>95% confidence interval range. <sup>d</sup>Could not determine 95% CI

**Supplemental Table S4. Sample-weighted multiple linear regression model for blood nitromethane (ng/L), where tobacco smoke exposure is represented by serum cotinine (non-users) and self-reported cigarettes per day (CPD; exclusive smokers). The geometric mean of nitromethane used for computing  $\Delta Y$  is 672 ng/L. NHANES 2007-2012 (N=6,464)**

| <i>Predictor</i>              | <i>Slope [95%CI]<sup>a</sup></i> | <i>p-Value<sup>a</sup></i> | <i><math>\Delta Y</math> [95% CI]<sup>b</sup></i> |
|-------------------------------|----------------------------------|----------------------------|---------------------------------------------------|
| <b>CPD</b>                    |                                  |                            |                                                   |
| Non-exposed                   | Ref. <sup>c</sup>                | .                          | Ref.                                              |
| SHS                           | 0.0452 [0.0182, 0.0722]          | 0.0015                     | 31.1 [12.8, 49.8]                                 |
| 1-10 CPD                      | 0.2020 [0.1677, 0.2363]          | <.0001                     | 150 [123, 178]                                    |
| 11-20 CPD                     | 0.3353 [0.2895, 0.3810]          | <.0001                     | 268 [227, 311]                                    |
| >20 CPD                       | 0.4682 [0.3907, 0.5457]          | <.0001                     | 401 [323, 486]                                    |
| <b>Sex</b>                    |                                  |                            |                                                   |
| Female                        | 0.0554 [0.0330, 0.0777]          | <.0001                     | 38.3 [23.0, 53.9]                                 |
| Male                          | Ref.                             | .                          | Ref.                                              |
| <b>Age (years)</b>            |                                  |                            |                                                   |
| 12-19                         | -0.0718 [-0.1039, -0.0396]       | <.0001                     | -46.6 [-65.9, -26.6]                              |
| 20-39                         | Ref.                             | .                          | Ref.                                              |
| 40-59                         | 0.0321 [0.0042, 0.0600]          | 0.0249                     | 21.9 [3.30, 41.1]                                 |
| ≥60                           | 0.1438 [0.1040, 0.1835]          | <.0001                     | 104 [74.4, 135]                                   |
| <b>Race/Ethnicity</b>         |                                  |                            |                                                   |
| Mexican American              | 0.1134 [0.0552, 0.1716]          | 0.0003                     | 80.7 [39.2, 125]                                  |
| Non-Hispanic Black            | 0.1387 [0.0967, 0.1807]          | <.0001                     | 100 [69.0, 132]                                   |
| Non-Hispanic White            | Ref.                             | .                          | Ref.                                              |
| Other Race                    | 0.1350 [0.0869, 0.1831]          | <.0001                     | 97.2 [61.9, 134]                                  |
| <b>BMI</b>                    |                                  |                            |                                                   |
| Healthy weight                | Ref.                             | .                          | Ref.                                              |
| Overweight                    | 0.0598 [0.0369, 0.0826]          | <.0001                     | 41.4 [25.7, 57.5]                                 |
| Underweight                   | -0.1024 [-0.1655, -0.0392]       | 0.0020                     | -65.4 [-102, -26.9]                               |
| <b>Poverty Status</b>         |                                  |                            |                                                   |
| No                            | Ref.                             | .                          | Ref.                                              |
| Yes                           | -0.0231 [-0.0599, 0.0137]        | 0.2140                     | -15.3 [-38.5, 8.69]                               |
| <b>NHANES Cycle</b>           |                                  |                            |                                                   |
| 2007-2008                     | 0.0181 [-0.0437, 0.0798]         | 0.5592                     | 12.3 [-27.7, 54.7]                                |
| 2009-2010                     | Ref.                             | .                          | Ref.                                              |
| 2011-2012                     | 0.0108 [-0.0371, 0.0587]         | 0.6534                     | 7.28 [-23.7, 39.8]                                |
| <b>Fasting time (hrs)</b>     | -0.0011 [-0.0036, 0.0014]        | 0.3963                     | -0.715 [-2.35, 0.924]                             |
| <b>Food Consumed (kg/day)</b> |                                  |                            |                                                   |
| Milk products                 | -0.0285 [-0.0763, 0.0193]        | 0.2369                     | -18.9 [-48.6, 12.3]                               |
| Meat, poultry                 | 0.0798 [0.0303, 0.1293]          | 0.0022                     | 55.9 [21.5, 91.9]                                 |

|                             |                            |        |                      |
|-----------------------------|----------------------------|--------|----------------------|
| Eggs                        | -0.0208 [-0.2084, 0.1668]  | 0.8246 | -13.8 [-124, 118]    |
| Legumes, nuts, seeds        | 0.2151 [0.0766, 0.3536]    | 0.0030 | 161 [56.0, 282]      |
| Grain products              | 0.0532 [0.0107, 0.0958]    | 0.0152 | 36.8 [7.96, 66.8]    |
| Fruits                      | 0.0356 [-0.0171, 0.0884]   | 0.1808 | 24.4 [-10.5, 61.2]   |
| Vegetables                  | 0.1851 [0.1164, 0.2539]    | <.0001 | 137 [84.2, 193]      |
| Fats, oils, salad dressings | 0.1855 [-0.2194, 0.5904]   | 0.3617 | 137 [-127, 529]      |
| Sugars, sweets, beverages   | -0.0159 [-0.0253, -0.0066] | 0.0013 | -10.6 [-16.6, -4.57] |
| Cured meat                  | 0.4670 [0.1066, 0.8273]    | 0.0122 | 400 [82.3, 852]      |
| Luncheon meat and hot dogs  | 0.0673 [-0.1143, 0.2489]   | 0.4600 | 46.8 [-69.9, 186]    |
| Tap water                   | -0.0097 [-0.0221, 0.0027]  | 0.1238 | -6.48 [-14.5, 1.64]  |

<sup>a</sup>The dependent variable, blood nitromethane (ng/L), was natural log-transformed for the regression model. <sup>b</sup> $\Delta Y$  is the expected change in nitromethane concentration in ng/L associated with a unit-increase in the predictor at the overall geometric mean, controlling for other predictors in the model. <sup>c</sup>Reference group

**Supplemental Table S5. Sample-weighted percentiles of serum cotinine, cigarettes smoked per day, and consumption of select food groups per day, NHANES 2007-2012 (N=6,730)<sup>a</sup>**

| <i>Variable</i>                                        | <i>Selected Percentiles</i>     |                                 |                                 |                                 |
|--------------------------------------------------------|---------------------------------|---------------------------------|---------------------------------|---------------------------------|
|                                                        | <i>50<sup>th</sup> [95% CI]</i> | <i>75<sup>th</sup> [95% CI]</i> | <i>90<sup>th</sup> [95% CI]</i> | <i>95<sup>th</sup> [95% CI]</i> |
| Serum cotinine [ng/mL], non-users<br>(N=5,345)         | 0.0243 [0.0220, 0.0266]         | 0.0727 [0.0629, 0.0825]         | 0.445 [0.336, 0.554]            | 1.49 [1.09, 1.88]               |
| Serum cotinine [ng/mL], exclusive smokers<br>(N=1,385) | 213 [192, 235]                  | 318 [299, 337]                  | 420 [394, 446]                  | 468 [437, 500]                  |
| Cigarettes per day (N=1,120)                           | 10.4 [8.88, 12.0]               | 19.5 [17.2, 21.8]               | 25.5 [22.0, 29.0]               | 29.7 [26.2, 33.2]               |
| <b><i>Food group (kg/day)</i></b>                      |                                 |                                 |                                 |                                 |
| Milk products                                          | 0.124 [0.110, 0.138]            | 0.332 [0.311, 0.353]            | 0.572 [0.545, 0.599]            | 0.778 [0.743, 0.813]            |
| Meat, poultry                                          | 0.140 [0.133, 0.148]            | 0.277 [0.266, 0.288]            | 0.454 [0.440, 0.468]            | 0.586 [0.557, 0.615]            |
| Eggs                                                   | – <sup>b</sup>                  | –                               | 0.107 [0.0992, 0.115]           | 0.156 [0.146, 0.165]            |
| Legumes, nuts, seeds                                   | –                               | 0.0160 [0.0115, 0.0204]         | 0.0922 [0.0809, 0.104]          | 0.186 [0.171, 0.201]            |
| Grain products                                         | 0.257 [0.246, 0.268]            | 0.438 [0.419, 0.457]            | 0.668 [0.646, 0.689]            | 0.817 [0.785, 0.849]            |
| Fruits                                                 | 0.0532 [0.0294, 0.0770]         | 0.246 [0.231, 0.262]            | 0.457 [0.425, 0.489]            | 0.629 [0.584, 0.675]            |
| Vegetables                                             | 0.115 [0.108, 0.123]            | 0.244 [0.234, 0.254]            | 0.399 [0.384, 0.415]            | 0.514 [0.489, 0.538]            |
| Fats, oils, salad dressings                            | –                               | 0.0142 [0.0130, 0.0154]         | 0.0343 [0.0302, 0.0384]         | 0.0588 [0.0567, 0.0609]         |
| Sugars, sweets, beverages                              | 1.36 [1.31, 1.42]               | 2.21 [2.12, 2.31]               | 3.26 [3.13, 3.38]               | 4.07 [3.84, 4.29]               |
| Cured meat                                             | –                               | –                               | –                               | 0.0159 [0.0122, 0.0196]         |
| Luncheon meat and hot dogs                             | –                               | –                               | 0.0569 [0.0560, 0.0579]         | 0.110 [0.0997, 0.121]           |
| Tap water                                              | 0.118 [0.0171, 0.220]           | 0.859 [0.771, 0.948]            | 1.80 [1.71, 1.89]               | 2.58 [2.37, 2.79]               |

<sup>a</sup>Same data as in stratified serum cotinine regression models. <sup>b</sup>Not calculated due to insufficient data for reliable estimate
